# Supplementary material
Source: PubMed Central journal article supplement (PMC3754210)
Supplement: IAI.00390-13_zii999090269so1.pdf [file IAI.00390-13_zii999090269so1.pdf]

## 1 **Supplemental text and figure legends**

2

### 3 ***RESULTS FROM THE LPS GROUP***

4

5 In order to compare the *E. coli* whole bacteria group, with the more frequently used  
6 endotoxin (LPS) model, we included an LPS group for comparison. The data are  
7 reported below and presented in supplemental figures and figure legends.

8

#### 9 ***E. coli DNA***

10

11 *E. coli* DNA was measured in two animals from the LPS group as controls. No *E. coli*  
12 DNA was detected in the organs from these animals (data not shown).

13

#### 14 ***LPS load***

15

16 LPS in the positive control samples were detected mainly in the lungs (mean 4.8 EU/  
17 mg tissue, range 4.774-4.83 EU/ mg tissue), in low levels in the spleen (mean 0.43  
18 EU/ mg tissue, range 0.142-0.671 EU/ mg tissue), very low levels in the liver (mean  
19 0.1 EU/ mg tissue, range 0.064-0.171 EU/ mg tissue) and was undetectable in the  
20 kidney.

21

22 *Comparison of the LPS load between the anti-CD14 group and the positive control*  
23 *group*

24

25 There was a slightly higher LPS amount in the anti-CD14 groups compared to the  
26 positive control groups in the lungs, liver and spleen (Supplemental Figure S1). In the  
27 kidneys, there was an ignorable amount of LPS (comparable to background values)  
28 detected in both the anti-CD14 group and the positive control group.

29

### 30 ***Inflammatory markers***

31

32 *In the LPS group, only cytokines measured by enzyme-immunoassays were included*

33

34 TNF was increased in all the organs in the positive control group (Supplemental  
35 Figure S2). There was a slightly higher load in the spleen compared to the other  
36 organs

37

38 IL-1 $\beta$  was increased in all the organs in the positive control group (Supplemental  
39 Figure S2). There was a substantially higher load in the spleen compared to the other  
40 organs. The IL-1 $\beta$  load in kidney was substantially lower than in all the other organs.

41

42 IL-6 was increased in all the organs in the positive control group (Supplemental  
43 Figure S2), but with very low levels in kidney. There was a substantially higher load  
44 in liver and spleen compared to lung and kidney.

45

46 IL-8 was increased in all the organs in the positive control group (Supplemental  
47 Figure S2), but with very low levels in the liver. There was a substantially higher load  
48 in spleen compared to the other organs. IL-10 was detected in liver and kidney, but  
49 not in lung and spleen (data not shown).

50

51 *Effect of anti-CD14 on the cytokine load*

52

53 A similar inhibitory effect of anti-CD14 as described for the *E. coli* group was seen in

54 the LPS group (Supplemental Figure S3). Additionally, anti-CD14 had a pronounced

55 inhibitory effect on the TNF level in the liver and kidney, not seen in the *E. coli*

56 group.

57

58

59

60

61 **Supplemental figure legends**

62

63 **Figure S1** *Effect of anti-CD14 on LPS load in the organs in the LPS group*

64 LPS load in the organs in the positive control group compared to the anti-CD14 group  
65 in the LPS group is shown. Data are presented as mean with range.

66

67 **Figure S2** *Cytokine load in the organs in the LPS group*

68 The organ load of the proinflammatory cytokines TNF, IL-1 $\beta$ , IL-6 and IL-8 in the  
69 organs in the positive control group is shown in the LPS group. Data are presented as  
70 mean with range.

71

72 **Figure S3** *Effect of anti-CD14 on the proinflammatory cytokine load in the organs in*  
73 *the LPS group*

74 Load of the proinflammatory cytokines TNF, IL-1 $\beta$ , IL-6 and IL-8 in the organs in the  
75 positive control group compared to the anti-CD14 group in the LPS group is shown.

76 Data are presented as mean with range.
