# Supplementary material
Source: PubMed Central journal article supplement (PMC3754210)

Fig. S1

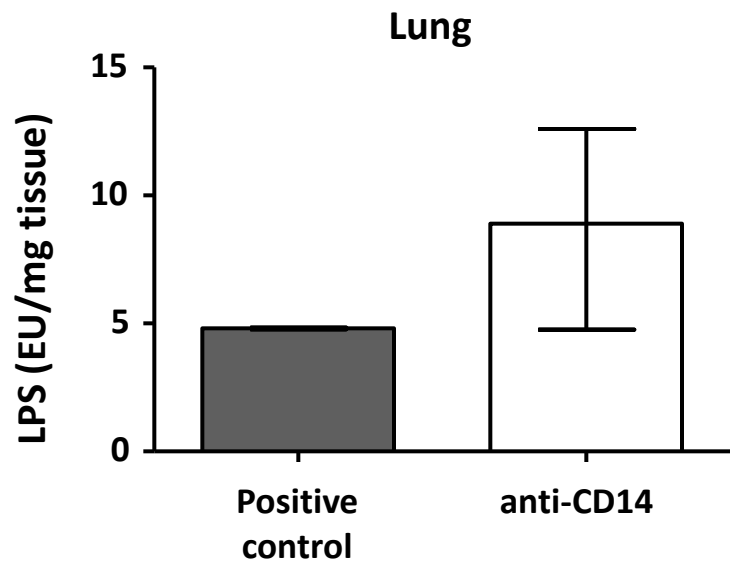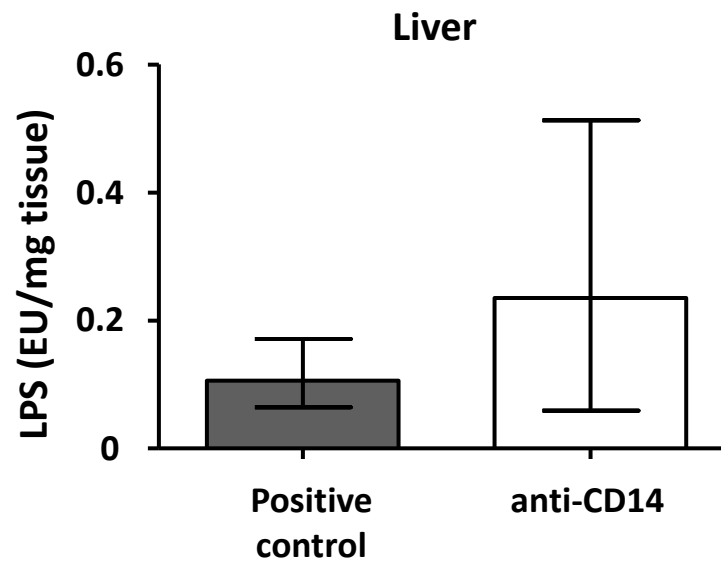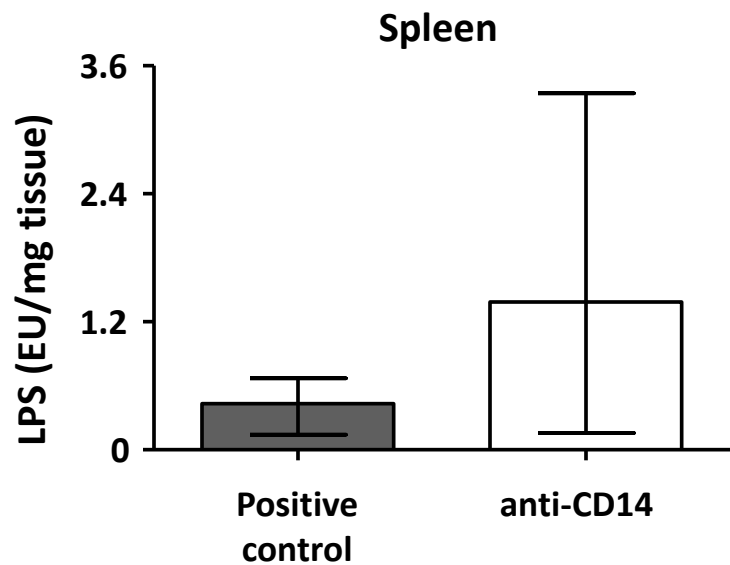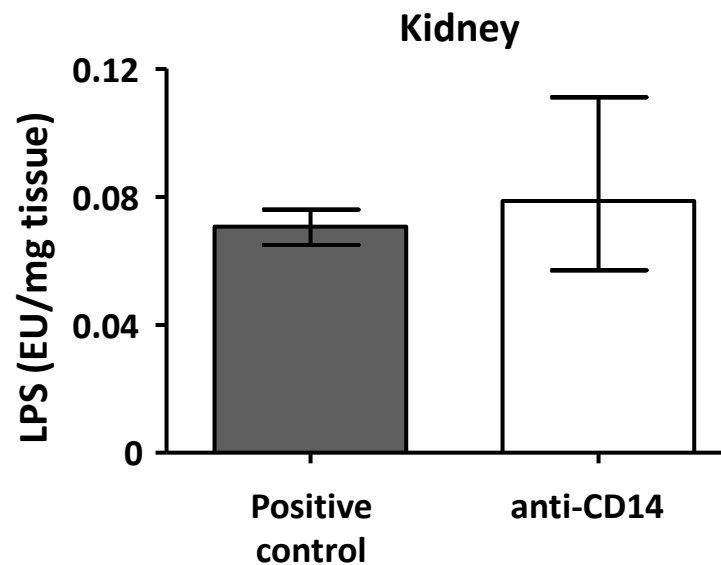

Supplement: IAI.00390-13_zii999090269so2.pdf [file IAI.00390-13_zii999090269so2.pdf]

Fig. S2

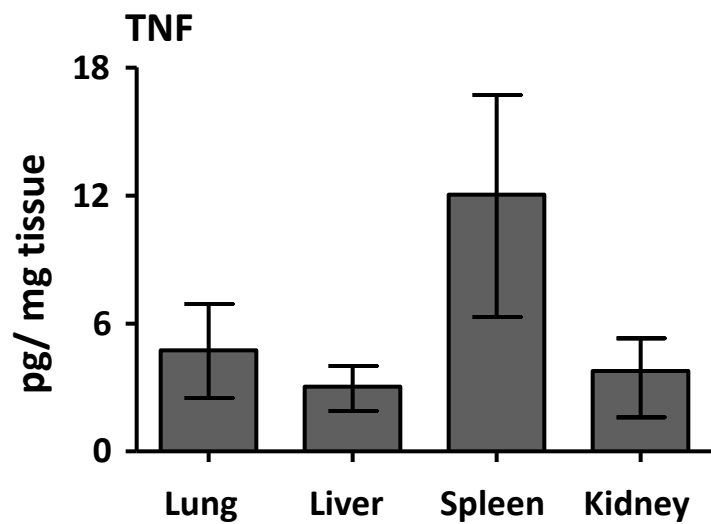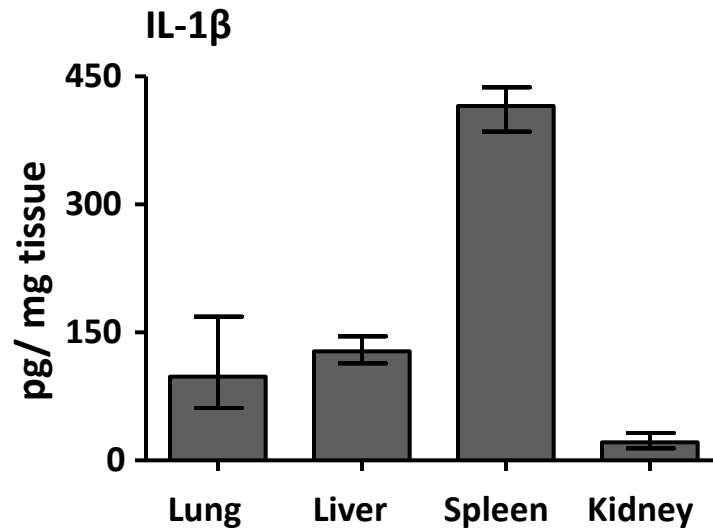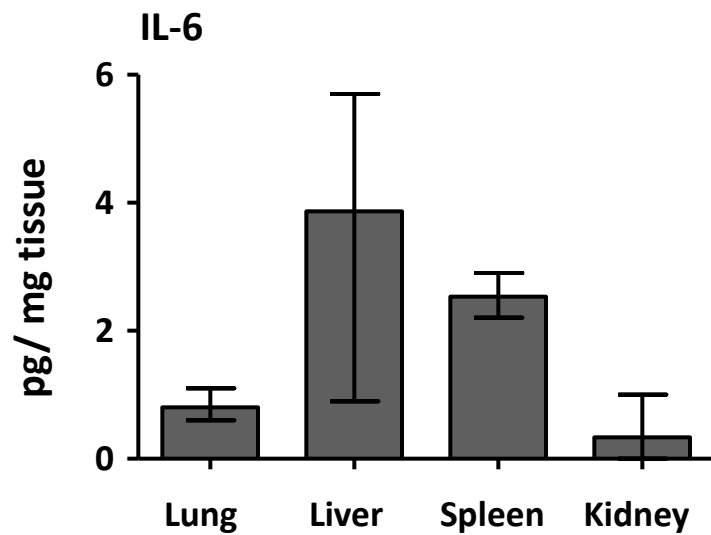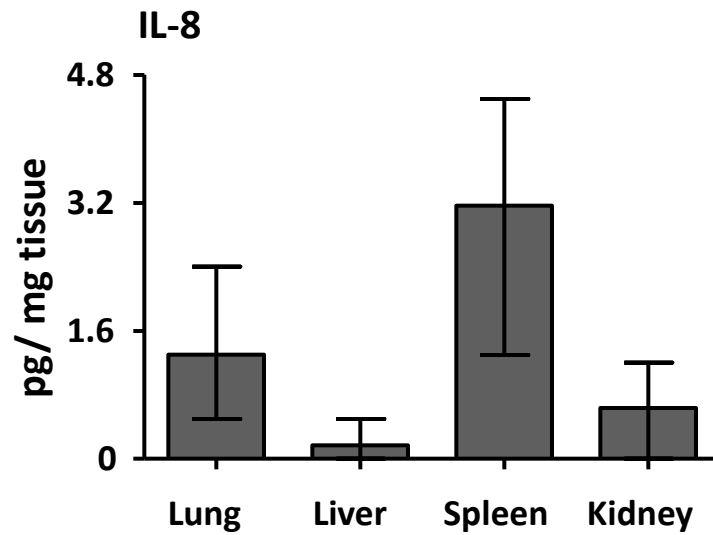

Supplement: IAI.00390-13_zii999090269so3.pdf [file IAI.00390-13_zii999090269so3.pdf]

Fig. S3

■ Positive control      □ anti-CD14

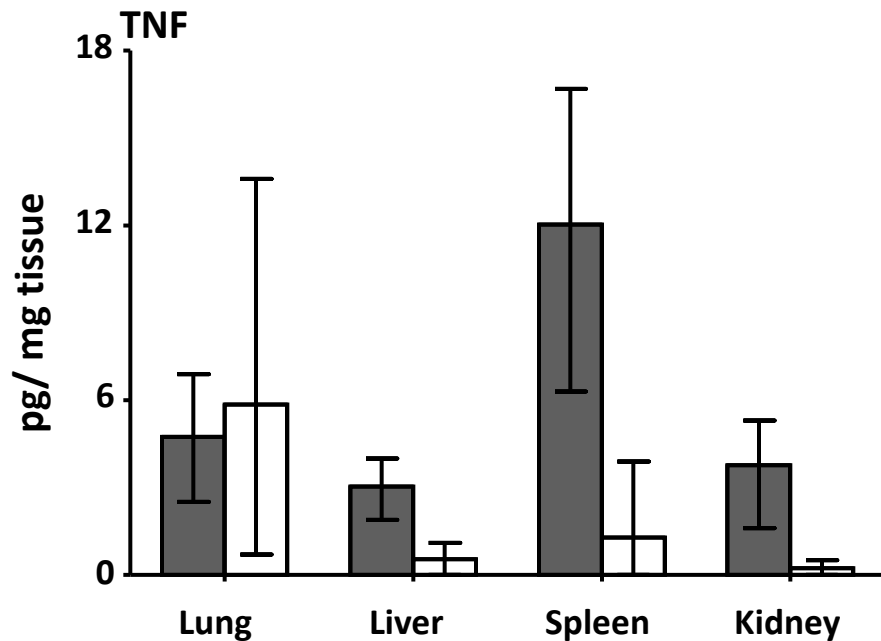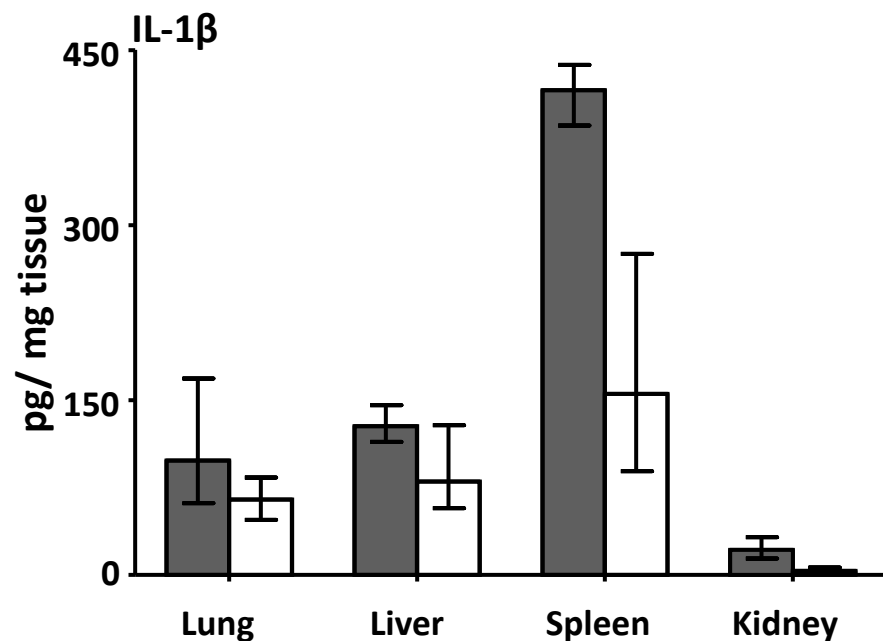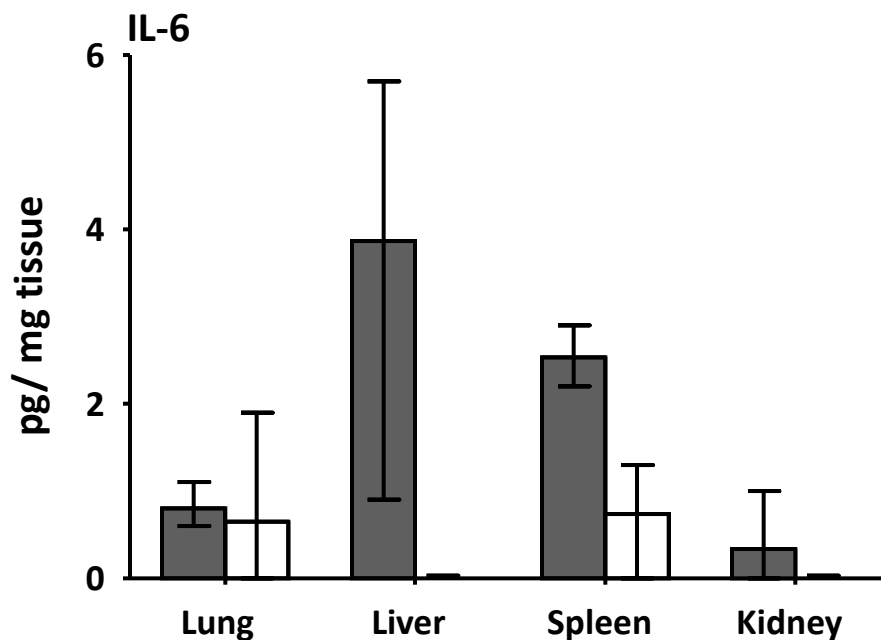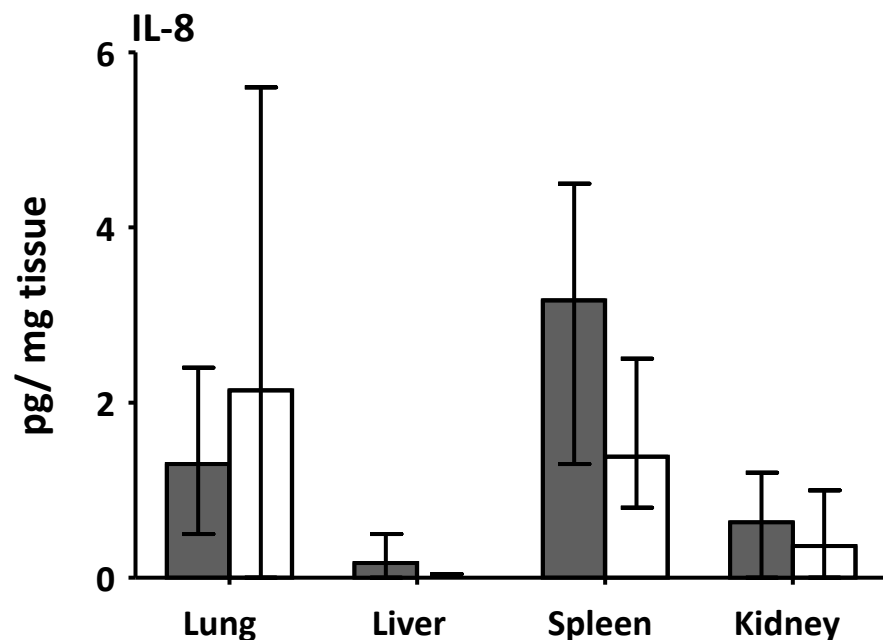

Supplement: IAI.00390-13_zii999090269so4.pdf [file IAI.00390-13_zii999090269so4.pdf]
